# Supplementary material
Source: HighWire-hosted journal article supplement (https://bmjopen.bmj.com/content/12/5/e061624)
Supplement: inline-supplementary-material-1 [file inline-supplementary-material-1.pdf]

## Supplemental

(cough assist OR cough assist techniques OR cough assistance OR cough assistance ventilation OR cough assisted OR cough assisting OR air stacking OR air stacking assisted OR air stacking exercise OR air stacking maneuvers OR air stacking group OR Therapy, Respiratory OR Respiratory Therapies OR Inhalation Therapy OR Inhalation Therapies OR Exercise, Breathing OR Respiratory Muscle Training OR Therapy, Exercise OR Exercise Therapies OR Rehabilitation Exercise OR Rehabilitation Exercises OR Modalities, Physical Therapy OR Physical Therapy Modality OR Physiotherapy OR Physiotherapies OR Physical Therapy Techniques OR Physical Therapy Technique OR Group Physiotherapy OR Group Physiotherapies OR Physical Therapy OR Physical Therapies OR Neurological Physiotherapy OR Neurophysiotherapy)

AND (Amyotrophic lateral sclerosis OR ALS Amyotrophic Lateral Sclerosis OR ALS Amyotrophic Lateral Sclerosis OR Amyotrophic Lateral Sclerosis Parkinsonism Dementia Complex 1 OR Amyotrophic Lateral Sclerosis With Dementia OR Amyotrophic Lateral Sclerosis, Guam Form OR Amyotrophic Lateral Sclerosis, Parkinsonism Dementia Complex of Guam OR Amyotrophic Lateral Sclerosis-Parkinsonism-Dementia Complex 1 OR Dementia With Amyotrophic Lateral Sclerosis OR Gehrig Disease OR Gehrig's Disease OR Guam Disease OR Lou Gehrig Disease OR Lou Gehrig's Disease OR Motor Neuron Disease, Amyotrophic Lateral Sclerosis OR Motor Neuron Diseases OR Motor System Disease OR Motor System Diseases OR Neuron Disease, Motor OR Lateral Scleroses OR Primary Lateral Scleroses OR Primary

Lateral Sclerosis OR Scleroses, Lateral OR Sclerosis, Lateral OR Upper Motor Neuron Disease OR Secondary Motor Neuron Disease OR Lower Motor Neuron Disease).
